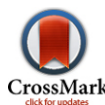

# Blue Marble Health: A Call for Papers

Peter J. Hotez<sup>1,2,3</sup>, Larry Peiperl<sup>4\*</sup>

**1** Sabin Vaccine Institute and Texas Children's Hospital Center for Vaccine Development, Departments of Pediatrics and Molecular Virology and Microbiology, National School of Tropical Medicine at Baylor College of Medicine, Houston, Texas, United States of America, **2** Departments of Medical Humanities and Biology, Baylor University, Waco, Texas, United States of America, **3** James A. Baker III Institute for Public Policy, Rice University, Houston, Texas, United States of America, **4** Public Library of Science, San Francisco, California, United States of America

In May 2014, *PLOS Medicine* joined *PLOS Neglected Tropical Diseases* in launching the Blue Marble Health Collection [1], to which we now invite ongoing manuscript submissions.

The collection (available at <http://www.ploscollections.org/bluemarblehealth/>) emerged from themes shared by both journals, and discussed in Editorials during 2013. First, a Viewpoint in *PLOS Neglected Tropical Diseases* [2] found that while some neglected tropical diseases (NTDs) such as river blindness, loiasis, African sleeping sickness, and schistosomiasis are largely or exclusively diseases of sub-Saharan Africa, paradoxically, many of the world's highest concentration of NTDs occur in the 20 wealthiest economies—the group of 20 (G20) countries—especially in the mostly hidden pockets of extreme poverty that can be found in the big middle-income nations, such as Indonesia, or in areas of the BRIC countries (Brazil, Russia, India, and China), including northeastern Brazil, northern India, and southwestern China. Moreover, the disease burden from NTDs is alarmingly high in the southern United States (especially in Texas and the Gulf Coast), in areas of Australia with large Aboriginal populations such as the Northern Territory, and in Eastern Europe.

A parallel Editorial in *PLOS Medicine* [3] noted that relative poverty within a society is a stronger predictor of health than aggregate measures of economic power such as gross national product or per capita income. For example, tens of millions of Americans living in poverty, including many people of color, “experience levels of health that are typical of middle-income or low-income countries.” The Editorial concluded that, for many issues that affect the health of people of lower socioeconomic status, clear-cut distinctions between “domestic” and “cross-border” research are becoming increasingly difficult to draw.

Blue Marble Health highlights a shift in current thinking about global health. Increasingly, an approach that emphasizes stark contrasts between “developing” and “developed” countries may no longer

reflect reality. Instead, major health disparities—including NTDs, but possibly also other infections such as tuberculosis, as well as noncommunicable diseases—disproportionately affect poor people living among wealthier people. Having evolved from paradigms of international health (in which high-income countries assist lower-income countries) through global health (in which countries work together to address health issues that affect the global community), Blue Marble Health reflects the insight that wherever socioeconomic inequality is pervasive, neglected diseases and other conditions naively assumed to arise only in the context of national poverty will spread. To address these problems, Blue Marble Health calls for attention to socioeconomic as well as biomedical factors—whether in Nigeria, South Africa, Brazil, and India, or in the US, Europe, and Australia.

At its launch in May 2014, the collection included more than 20 Editorials, Viewpoints, Policy Forums, and Research Articles from *PLOS Neglected Tropical Diseases* and *PLOS Medicine*, as well as an Essay from *PLOS Biology*. Each highlights a health disparity that disproportionately strikes poor people living in G20 countries or other countries generally thought of as

well-off. The launching of the collection also coincided with the publication of a new *PLOS Neglected Tropical Diseases* Editorial that identifies ten global “hotspots” for endemic and epidemic NTDs [4].

Mahatma Gandhi once stated: “It is a trite saying that one half of the world knows not how the other lives. Who can say what sores might be healed, what hurts solved, were the doings of each half of the world's inhabitants understood and appreciated by the other?” [5] A century later, although the importance of mutual appreciation among diverse populations has only increased, the world no longer divides itself easily into halves on the basis of national boundaries or economic cut-points. Amartya Sen, who was awarded the Sveriges Riksbank Prize in Economic Sciences in 1998, has articulated a distinction between “the difficult problem of assessing the richness of human lives, including the freedoms that human beings have reason to value, and...the much easier exercise of keeping track of incomes and other external resources that persons—or nations—happen to have” [6]. In Sen's words, “human well-being and freedom, and their connection with fairness and justice in the world, cannot be reduced simply to the measurement of GDP and its growth rate, as many people are tempted to do.” The term “Blue Marble Health”

**Citation:** Hotez PJ, Peiperl L (2014) Blue Marble Health: A Call for Papers. *PLoS Med* 11(7): e1001682. doi:10.1371/journal.pmed.1001682

**Published:** July 29, 2014

**Copyright:** © 2014 Hotez, Peiperl. This is an open-access article distributed under the terms of the Creative Commons Attribution License, which permits unrestricted use, distribution, and reproduction in any medium, provided the original author and source are credited.

**Funding:** LP is paid a salary by the Public Library of Science, and he wrote this editorial during his salaried time.

**Competing Interests:** PH is Co-Editor-in-Chief of *PLOS Neglected Tropical Diseases* and LP is Chief Editor of *PLOS Medicine*. PH is also Professor of Pediatrics and Dean of the National School of Tropical Medicine at Baylor College of Medicine, Texas Children's Hospital Endowed Chair of Tropical Pediatrics, and President of the Sabin Vaccine Institute. LP is also Clinical Professor of Medicine at UCSF and an Attending Physician at San Francisco General Hospital.

**Abbreviations:** G20, group of 20; NTD, neglected tropical disease.

\* E-mail: [lpeiperl@plos.org](mailto:lpeiperl@plos.org)

**Provenance:** Written by editorial staff; not externally peer reviewed. An earlier version of this editorial was posted on the PLOS Community Blog Speaking of Medicine on May 29, 2014.

reflects an understanding that, as a fundamental prerequisite for well-being and richness in human lives, health must not be limited by simplistically defined boundaries, be they geographical or economic.

Moving forward, we encourage the community of biomedical and social scien-

tists, health economists, health-care professionals, and public health workers to submit papers to us at PLOS that highlight health disparities among low-income and otherwise disadvantaged populations, those who are often forgotten in the world's middle- and high-income countries.

## Author Contributions

Wrote the first draft of the manuscript: PJH LP. Contributed to the writing of the manuscript: PJH LP. ICMJE criteria for authorship read and met: PJH LP. Agree with manuscript results and conclusions: PJH LP.

## References

1. (2014) Blue marble health: the mismatch between national wealth and population health. PLOS Collections. Available: <http://www.ploscollections.org/article/browse/issue/info%3Adoi%2F10.1371%2Fissue.pool%2F1.23>. Accessed 25 June 2014.
2. Hotez PJ (2013) NTDs V.2.0: “blue marble health”—neglected tropical disease control and elimination in a shifting health policy landscape. PLoS Negl Trop Dis 7: e2570. doi:10.1371/journal.pntd.0002570
3. The PLOS Medicine Editors (2013) Poor health in rich countries: a role for open access journals. PLoS Med 10: e1001543. doi:10.1371/journal.pmed.1001543
4. Hotez PJ (2014) Ten global “hotspots” for the neglected tropical diseases. PLoS Negl Trop Dis 8: e2496. doi:10.1371/journal.pntd.0002496
5. Gandhi M, Fischer L (editor) (1962) The essential Gandhi: an anthology of his writings on his life, work, and ideas. New York: Vintage Books.
6. United Nations Development Programme (2013) Human development report 2013. New York: United Nations Development Programme.
